# Supplementary material for: A randomized feasibility trial comparing four antimalarial drug regimens to induce Plasmodium falciparum gametocytemia in the controlled human malaria infection model
Source: eLife. 2018 Feb 27;7:e31549. doi: 10.7554/eLife.31549 (PMC5828662; doi:10.7554/eLife.31549)
Supplement: Table 1—source data 1. [file elife-31549-table1-data1.xlsx]

## Sheet: Group
2878-D.S.	3259-D.B.	3366-D.V.	3899-E.D.	3270-D.O.	3368-E.B.	3382-D.K.	3934-E.N.	1960-D.F.	3903-D.X.	3911-D.Y.	3963-E.F.	1970-D.L.	2257-E.A.	2921-E.K.	3146-D.N.
LD-SP/SP	LD-SP/SP	LD-SP/SP	LD-SP/SP	LD-SP/PIP	LD-SP/PIP	LD-SP/PIP	LD-SP/PIP	LD-PIP/PIP	LD-PIP/PIP	LD-PIP/PIP	LD-PIP/PIP	LD-PIP/SP	LD-PIP/SP	LD-PIP/SP	LD-PIP/SP

## Sheet: Sex
2878-D.S.	3259-D.B.	3366-D.V.	3899-E.D.	3270-D.O.	3368-E.B.	3382-D.K.	3934-E.N.	1960-D.F.	3903-D.X.	3911-D.Y.	3963-E.F.	1970-D.L.	2257-E.A.	2921-E.K.	3146-D.N.
F	M	M	F	F	F	F	F	F	F	F	M	F	F	F	M

## Sheet: Age
2878-D.S.	3259-D.B.	3366-D.V.	3899-E.D.	3270-D.O.	3368-E.B.	3382-D.K.	3934-E.N.	1960-D.F.	3903-D.X.	3911-D.Y.	3963-E.F.	1970-D.L.	2257-E.A.	2921-E.K.	3146-D.N.
25	22	28	24	29	23	20	21	21	21	20	22	21	25	27	21	years old at screening

## Sheet: Weight
2878-D.S.	3259-D.B.	3366-D.V.	3899-E.D.	3270-D.O.	3368-E.B.	3382-D.K.	3934-E.N.	1960-D.F.	3903-D.X.	3911-D.Y.	3963-E.F.	1970-D.L.	2257-E.A.	2921-E.K.	3146-D.N.
73	58	73	65	57	57	77	75	81	72	63	76	86	82	64	90	kg at screening

## Sheet: BMI
2878-D.S.	3259-D.B.	3366-D.V.	3899-E.D.	3270-D.O.	3368-E.B.	3382-D.K.	3934-E.N.	1960-D.F.	3903-D.X.	3911-D.Y.	3963-E.F.	1970-D.L.	2257-E.A.	2921-E.K.	3146-D.N.
22.3	18	21.3	22.5	19.3	20.4	24.6	23.7	27	25.5	20.6	23.5	27.1	29.4	24.1	25.5	at screening
